# Supplementary material for: A MARTX Toxin rtxA Gene Is Controlled by Host Environmental Signals through a CRP-Coordinated Regulatory Network in Vibrio vulnificus
Source: PubMed Central journal article supplement (PMC7387792; doi:10.1128/mbio.00723-20), 2020-07-28
Supplement: mBio.00723-20-sf003.pdf [file mBio.00723-20-sf003.pdf]

Fragment size (bp)

100 200 300 400 500

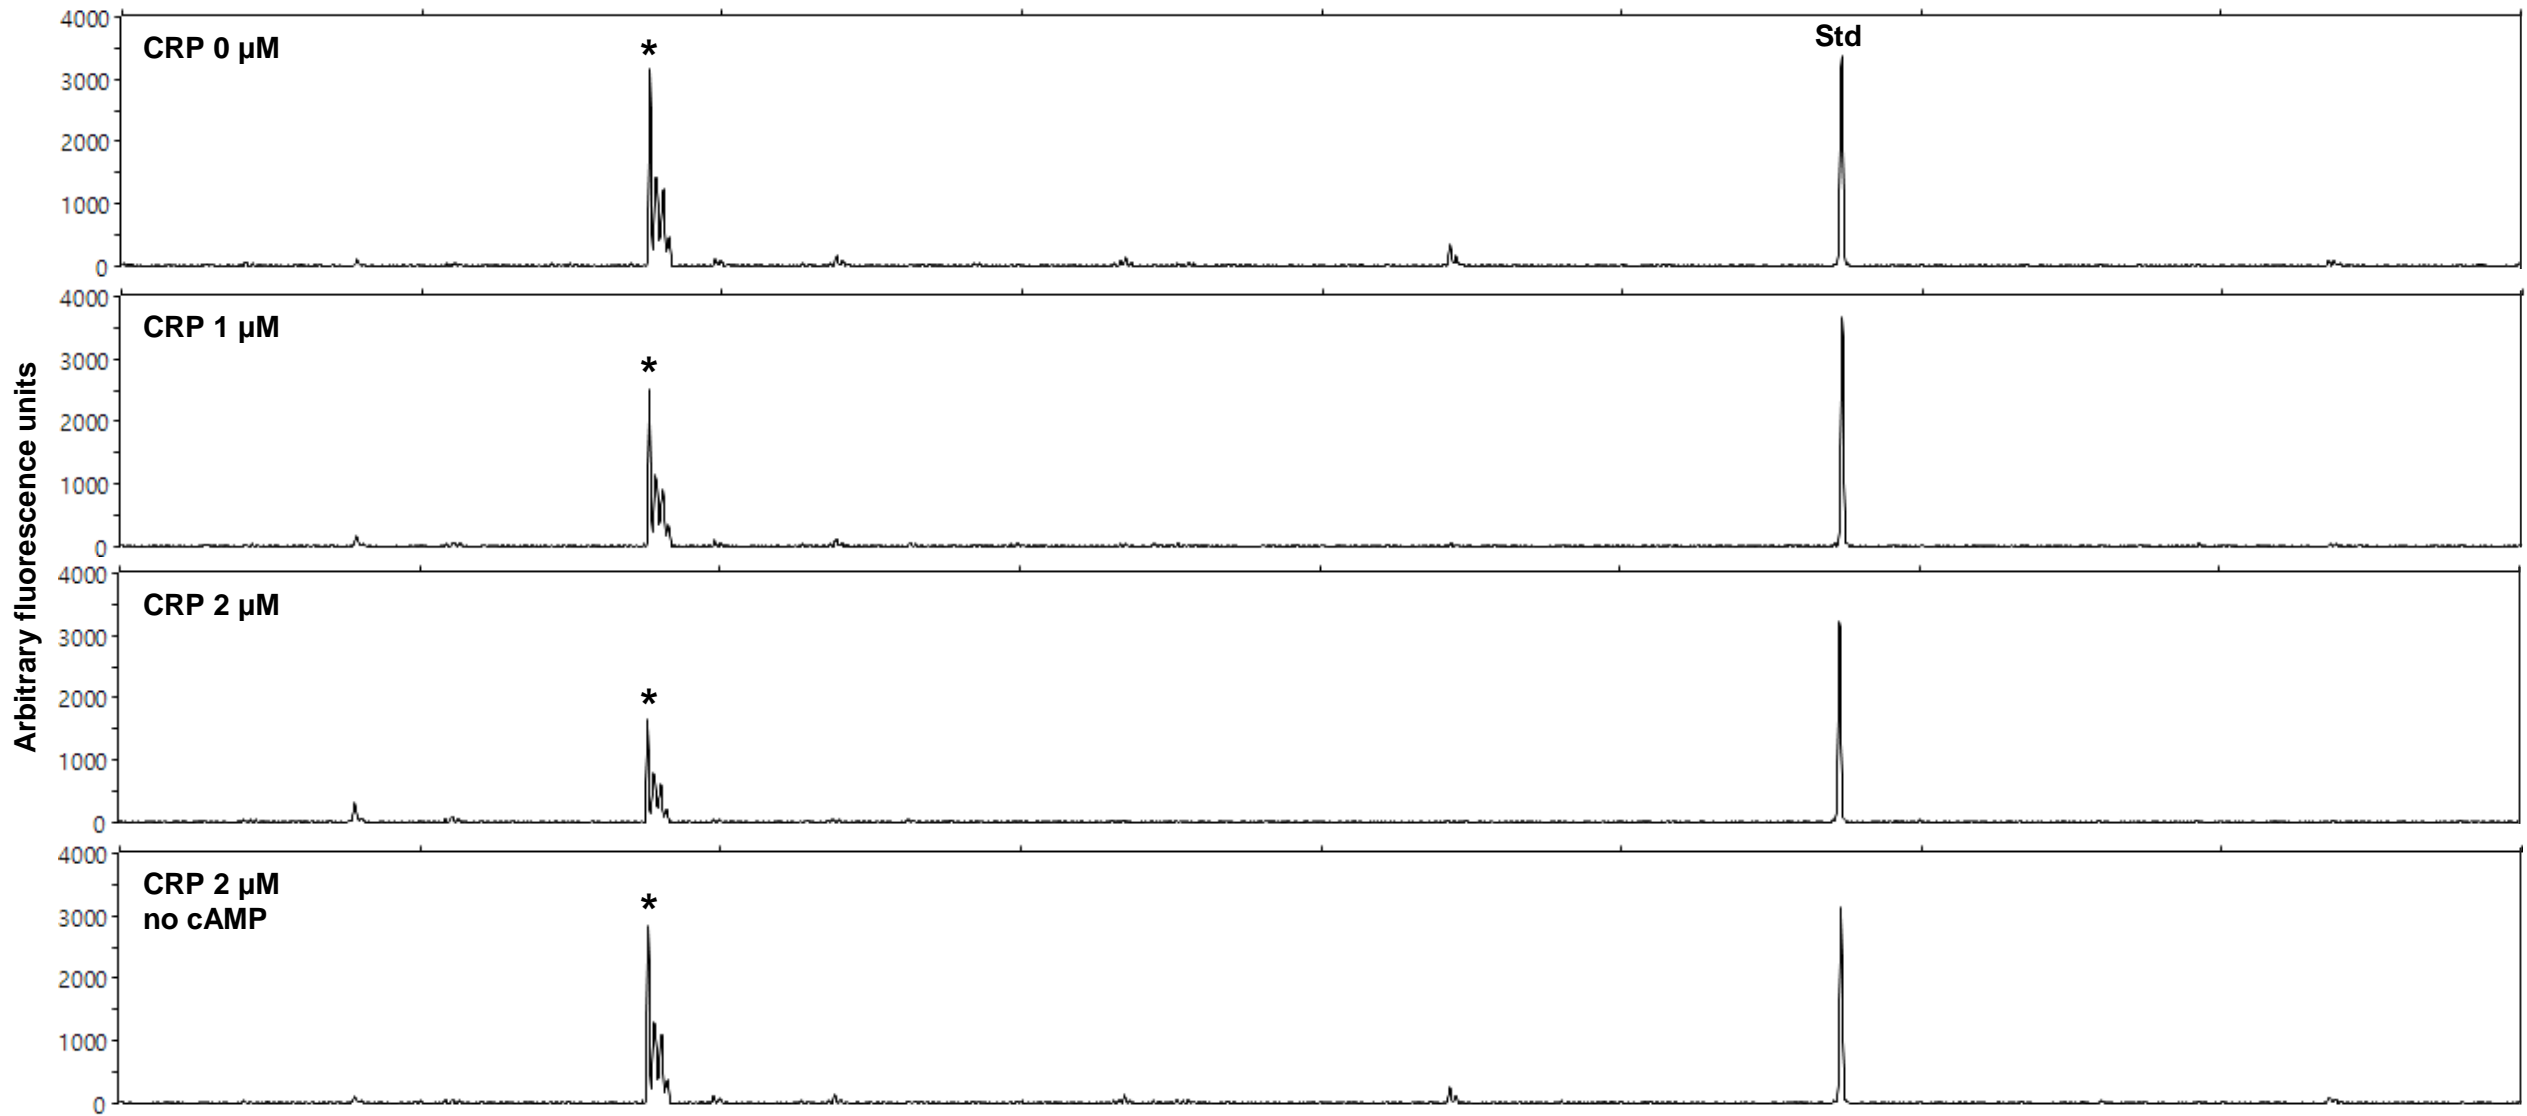

Figure S3. Lee *et al.*
